# Supplementary material for: Analysis of the mouse transcriptome based on functional annotation of 60,770 full-length cDNAs
Source: Springer Nature journal article supplement (doi:10.1038/nature01266), 2002-12-01
Supplement: 41586_2002_BFnature01266_MOESM14_ESM.pdf [file 41586_2002_BFnature01266_MOESM14_ESM.pdf]

## Supplementary Information 14

### A. TU/bases

|                               | Protein-coding | Non-coding |
|-------------------------------|----------------|------------|
| representative sequences (TU) | 17594          | 15815      |
| bases                         | 37804289       | 29853506   |
| average size                  | 2148.70        | 1887.67    |

### B. PolyA signal

|                 | Protein-coding |        | Non-coding |        |
|-----------------|----------------|--------|------------|--------|
| AATAAA          | 6766           |        | 3720       |        |
| ATTAAG          | 1880           | 49.14% | 1155       | 30.83% |
| No polyA signal | 8948           | 50.86% | 10940      | 69.17% |

### C. PolyA tail (genome mapping: >=95%ID, >=100bp, 3'end aligned up to the end)

|                     |                                | Protein-coding   |        | Non-coding      |        |
|---------------------|--------------------------------|------------------|--------|-----------------|--------|
| No/short polyA tail |                                | 59               | 0.34%  | 27              | 0.17%  |
| with polyA tail     | not mapped                     | 889              | 5.05%  | 785             | 4.96%  |
|                     | # of "A"= 0- 9/20bps in genome | 11983<br>(1,478) | 68.11% | 6047<br>(3,385) | 38.24% |
|                     | # of "A"=10-14/20bps in genome | 2573<br>(632)    | 14.62% | 3729<br>(3,097) | 23.58% |
|                     | # of "A"=15-20/20bps in genome | 2090<br>(906)    | 11.88% | 5227<br>(4,579) | 33.05% |

( ): unspliced

### D. Spliced (genome mapping: >=95%ID, >=100bp)

|                       | Protein-coding |        | Non-coding |        |
|-----------------------|----------------|--------|------------|--------|
| not mapped            | 244            | 1.39%  | 404        | 2.55%  |
| spliced               | 14192          | 80.66% | 4148       | 26.23% |
| unspliced/single exon | 3158           | 17.95% | 11263      | 71.22% |

E. Sequence quality (Phred/Phrap value)

|       | Protein-coding |        | Non-coding |        |
|-------|----------------|--------|------------|--------|
|       |                |        |            |        |
| 0-9   | 303553         | 0.80%  | 246053     | 0.82%  |
| 10-19 | 791687         | 2.09%  | 608153     | 2.04%  |
| 20-29 | 1927910        | 5.10%  | 1325928    | 4.44%  |
| 30-39 | 3758918        | 9.94%  | 2612022    | 8.75%  |
| 40-49 | 4973085        | 13.15% | 3868318    | 12.96% |
| 50-59 | 5448644        | 14.41% | 4496829    | 15.06% |
| 60-69 | 4285038        | 11.33% | 3729881    | 12.49% |
| 70-79 | 5118264        | 13.54% | 4337335    | 14.53% |
| 80-89 | 3829462        | 10.13% | 3289031    | 11.02% |
| >90   | 7367728        | 19.49% | 5339956    | 17.89% |

F. Sequence quality (genome alignment 2: >=100bp)

|                   | Protein-coding |        | Non-coding |        |
|-------------------|----------------|--------|------------|--------|
|                   |                |        |            |        |
| aligned sequences | 17496          | 99.44% | 15500      | 98.01% |
| aligned bases     | 36614430       |        | 29080199   |        |
| matched bases     | 36530010       | 99.77% | 29012867   | 99.77% |
| mismatched bases  | 63353          | 0.17%  | 48792      | 0.17%  |
| inserted bases    | 21067          | 0.06%  | 18540      | 0.06%  |
| deleted bases     | 18435          |        | 13963      |        |

These tables show comparison of sequence information for protein-coding and non-coding transcripts in the RTPS. These analyses were done for FANTOM2 representative 33,409 sequences since not all information can be obtained for public sequences. (A) This table shows the number of representative sequences (TUs), total bases and average sizes. There are no significant differences between the two groups. (B) This table shows how many sequences have polyA signals in protein-coding and non-coding transcripts. The protein coding RNA has a larger proportion of polyA signals, whilst a comparable number of non-coding RNAs have polyA signals. (C) We have checked the 20bp of the genomic region of the 3'end of each clone that was mapped to the mouse genome with  $\geq 95\%ID$ ,  $\geq 100bp$  and aligned down to the 3' end. '# of "A" = 15-20' means that there are 15-20 bp of 'A' sequences in the 20 bp region scanned. The number of clones containing polyA in the genomic region is 2090 (11.88 %) vs 5227 (33.05%). Although a larger proportion of non-coding RNAs have the genome encoding

polyA, it unlikely these are the contamination of the genome. For we strategically excluded the sequences for further analyses if they did not contain polyA with the restriction enzyme sites used for the cloning procedure. (D) The ratio of splicing is evaluated for clones mapped to the mouse genome with  $\geq 95\%ID$ ,  $\geq 100bp$ . There is higher ratio of unspliced sequences in the non-coding RNAs. It is likely that most of the non-coding RNAs are not spliced like *Air*. (E) The distribution of Phred/Phrap scores for each base between protein coding vs non-coding transcripts. The unit is bp. Each number shows how many bps are categorized for each sequence quality. The sequence quality between the two classes did not differ. (F) This is another way of looking at the quality of sequencing by comparison with the genomic sequence of the mouse genome (MGSCv3). The genome sequence was used as a standard. This comparison used best-hit alignments with  $\geq 100bp$ . No differences in the quality of the sequences between the two classes denying the possibility that the failure to annotate a CDS is the reason for the annotation of non-coding RNAs.
