# Supplementary material for: Analysis of the mouse transcriptome based on functional annotation of 60,770 full-length cDNAs
Source: Springer Nature journal article supplement (doi:10.1038/nature01266), 2002-12-01
Supplement: 41586_2002_BFnature01266_MOESM18_ESM.pdf [file 41586_2002_BFnature01266_MOESM18_ESM.pdf]

Supplementary information 17 Representative examples of known gene families.

| Family                              | Total        | Known        | New to mouse |
|-------------------------------------|--------------|--------------|--------------|
| 1 ATP-binding cassette              | 47           | 42           | 5            |
| 2 BAG                               | 6            | 3            | 3            |
| 3 bHLH                              | 102          | 99           | 3            |
| 4 Bcl-2                             | 27           | 27           | 0            |
| 5 BIRs (of IAP)                     | 7            | 6            | 1            |
| 6 BRCT                              | 26           | 23           | 3            |
| 7 CARDs                             | 18           | 13           | 5            |
| 8 Caspases                          | 10           | 10           | 0            |
| 9 CDK                               | 18           | 17           | 1            |
| 10 Centrins                         | 4            | 3            | 1            |
| 11 CIDE                             | 5            | 5            | 0            |
| 12 Cyclins                          | 21           | 19           | 2            |
| 13 Cytokine-related                 | 123          | 107          | 16           |
| 14 Death Effectors Domains (DED)    | 10           | 10           | 0            |
| 15 Death Domains (DD)               | 33           | 29           | 4            |
| 16 De-ubiquitinating enzymes        | 60           | 32           | 28           |
| 17 E1 Ubiquitin-activating enzymes  | 14           | 10           | 4            |
| 18 E2 Ubiquitin-conjugating enzymes | 50           | 18           | 32           |
| 19 E3 Ubiquitin-protein ligases     | 344          | 160          | 184          |
| 20 FtsJ                             | 5            | 2            | 3            |
| 21 GPCR                             | 213          | 165          | 48           |
| 22 HDAC                             | 10           | 7            | 3            |
| 23 Homeobox                         | 212          | 191          | 21           |
| 24 IAP antagonist                   | 3            | 2            | 1            |
| 25 IκB                              | 6            | 6            | 0            |
| 26 Immunoglobulin superfamily       | 2,322        | 2,172        | 150          |
| 27 Kinesins                         | 45           | 45           | 0            |
| 28 MCM                              | 9            | 7            | 2            |
| 29 Myb                              | 34           | 20           | 14           |
| 30 NACHT                            | 16           | 10           | 6            |
| 31 NIMA                             | 9            | 7            | 2            |
| 32 PAAD (pyrin)                     | 12           | 6            | 6            |
| 33 Protein Kinases                  | 626          | 512          | 114          |
| 34 Protein Phosphatases             | 194          | 147          | 47           |
| 35 REL                              | 5            | 5            | 0            |
| 36 SNF2                             | 23           | 12           | 11           |
| 37 Spindlins (Spin_Ssty)            | 6            | 5            | 1            |
| 38 TIR                              | 13           | 13           | 0            |
| 39 TNF Ligands                      | 17           | 17           | 0            |
| 40 TNF Receptors                    | 27           | 26           | 1            |
| 41 TRAF/TEF                         | 18           | 17           | 1            |
| 42 Zinc fingers C2H2-type           | 494          | 306          | 188          |
| <b>Total</b>                        | <b>5,244</b> | <b>4,333</b> | <b>911</b>   |

Total (mouse transcriptome): Representative examples of known protein families

Known (public mouse): Families define by motif and/or biology

New to mouse (RIKEN clones): Novel genes found in the FANTOM data set
