# Supplementary material for: Analysis of the mouse transcriptome based on functional annotation of 60,770 full-length cDNAs
Source: Springer Nature journal article supplement (doi:10.1038/nature01266), 2002-12-01
Supplement: 41586_2002_BFnature01266_MOESM22_ESM.pdf [file 41586_2002_BFnature01266_MOESM22_ESM.pdf]

The table of library information for all RIKEN 5' ESTs

Note) Protocol for Library ID G0,G1,K2,K3,K4,K5,L0,L1,L2,L7 and L8 are prepared by libraries subtraction.

| Library ID | Number of sequences | Tissue(e=embryo, L=Lactation, Po=Postnatal age, Pr=Pregnancy) |
|------------|---------------------|---------------------------------------------------------------|
| 01         | 954                 | blastocysts                                                   |
| 06         | 1548                | kidney                                                        |
| 07         | 145                 | brain                                                         |
| 08         | 77                  | lung                                                          |
| 09         | 384                 | spleen                                                        |
| 10         | 928                 | heart                                                         |
| 11         | 2053                | e18 w.body                                                    |
| 12         | 886                 | lung                                                          |
| 13         | 343                 | liver                                                         |
| 14         | 79                  | brain                                                         |
| 15         | 781                 | cerebellum                                                    |
| 16         | 455                 | placenta                                                      |
| 17         | 1866                | testis                                                        |
| 18         | 666                 | pancreas neonate10days                                        |
| 20         | 960                 | small intestine                                               |
| 21         | 251                 | liver and lung                                                |
| 22         | 879                 | stomach                                                       |
| 23         | 1481                | tongue                                                        |
| 24         | 944                 | ES                                                            |
| 25         | 825                 | e13 liver                                                     |
| 26         | 1396                | e10 w. body                                                   |
| 27         | 749                 | e11 w.body                                                    |
| 28         | 1306                | e10+e11 w.body                                                |
| 29         | 594                 | hippocampus                                                   |
| 30         | 523                 | e12 head                                                      |
| 31         | 619                 | e13 head                                                      |
| 32         | 725                 | e14+17 head                                                   |
| 33         | 541                 | e17 head                                                      |
| 34         | 260                 | e10 w.body                                                    |
| 35         | 117                 | brain                                                         |
| 36         | 106                 | brain                                                         |
| 37         | 92                  | e12 lower body                                                |
| 38         | 404                 | Pr18 placenta+ex.embrionic tissue                             |
| 39         | 269                 | e13 w.body                                                    |
| 40         | 976                 | e15 head                                                      |
| 41         | 223                 | e16 head                                                      |
| 42         | 51                  | Pr1 mammary gland                                             |
| 44         | 287                 | e14 liver                                                     |
| 46         | 1184                | Po10 skin                                                     |
| 47         | 1523                | Po10 skin                                                     |
| 48         | 1588                | Po0 head                                                      |
| 49         | 7290                | testis                                                        |
| 50         | 682                 | Pr11 ovary & uterus                                           |
| 51         | 495                 | Po10 intestine                                                |
| 52         | 196                 | xiphoid cartilage                                             |
| 53         | 976                 | pituitary gland                                               |
| 54         | 537                 | Po6 head                                                      |
| 55         | 507                 | Po10 head                                                     |
| 56         | 149                 | e6 w.body                                                     |

|    |      |                         |
|----|------|-------------------------|
| 57 | 1871 | e8 w.body               |
| 58 | 1157 | thymus                  |
| 59 | 694  | e13 forelimb            |
| 60 | 1370 | e13 testis              |
| 61 | 178  | e14 thymus              |
| 62 | 532  | e11 head                |
| 63 | 1542 | medulla oblongata       |
| 64 | 1662 | olfactory brain         |
| 65 | 428  | Po10 cerebellum         |
| 66 | 1412 | e12 ovary               |
| 67 | 743  | e12 extra testis        |
| 68 | 420  | e12 extra ovary         |
| 70 | 218  | e11 gonad               |
| 71 | 595  | sympathetic ganglion    |
| 72 | 139  | Pr1 ovary               |
| 73 | 285  | adrenal gland           |
| 74 | 991  | invitro fertilized eggs |
| 75 | 289  | eyeball                 |
| 76 | 125  | c.striatum              |
| 77 | 218  | cortex                  |
| 79 | 117  | e11 extra gonad         |
| 80 | 632  | e15 testis              |
| 81 | 94   | e15 upper body          |
| 82 | 290  | e15 lower body          |
| 83 | 77   | uterus                  |
| 84 | 361  | e16 lung                |
| 85 | 128  | e11 upper body          |
| 86 | 198  | Pr14 mammary gland      |
| 90 | 1505 | colon                   |
| 91 | 1616 | cecum                   |
| 92 | 1197 | extra testis            |
| 93 | 1617 | diencephalon            |
| 94 | 2278 | e12 upper body          |
| 95 | 2357 | urinary bladder         |
| 96 | 1273 | Po16 cerebellum         |
| 98 | 1122 | bone                    |
| 99 | 1096 | vagina                  |
| A0 | 509  | Po6 skin                |
| A1 | 2499 | Po16 thymus             |
| A2 | 2254 | hypothalamus            |
| A3 | 1733 | spinal cord             |
| A4 | 3420 | Po0 thymus              |
| A5 | 1647 | aorta and vein          |
| A6 | 2033 | Po3 thymus              |
| A7 | 2153 | Po7 cerebellum          |
| A8 | 1630 | Po10 cortex             |
| A9 | 1546 | retina                  |
| AA | 383  | RCB-0544 MBT-2          |
| AB | 753  | RCB-0549 Cle-H3         |
| AC | 138  | RCB-0559 K-1. F1        |
| AD | 330  | RCB-0035 WEHI-3         |
| AE | 480  | RCB-1283 B16 melanoma   |
| AF | 322  | RCB-0464 Meth-A         |
| AG | 465  | RCB-0545 OHTA           |

|    |       |                               |
|----|-------|-------------------------------|
| AH | 722   | CRL-2070 NE                   |
| AI | 502   | CCL-142 RAG                   |
| AJ | 211   | CRL-1734 SCA-9 clone15        |
| AK | 344   | CRL-2116 JC                   |
| AL | 287   | CRL-1751 WEHI164              |
| AM | 509   | CRL-1443 BC3H1                |
| AN | 553   | CRL-1669 BCL1clone 13.20-3B3  |
| AO | 559   | CRL-2028 SR-4987              |
| AP | 172   | CRL-2065 MLTC-1               |
| AQ | 153   | CRL-1702 WEHI231              |
| AR | 343   | intestinal mucosa             |
| AS | 247   | accessory axillary lymph node |
| AT | 110   | jejunal and colic lymph node  |
| AU | 191   | e13 brain                     |
| AV | 317   | e13 spinal cord               |
| AW | 341   | e15 brain                     |
| AX | 244   | Pr10 ovary and uterus         |
| AY | 215   | Po8 testis                    |
| AZ | 724   | Po16 diencephalon             |
| B0 | 1456  | egg 2cell                     |
| B1 | 1002  | e9.5 partenogenote            |
| B2 | 3866  | corpora quadrigemina          |
| B3 | 178   | adrenal gland                 |
| B4 | 1213  | Po4 adipose                   |
| B5 | 220   | cortex                        |
| B6 | 254   | Po4 thymus                    |
| B7 | 158   | Po6 medulla oblongata         |
| B8 | 565   | Po10 medulla oblongata        |
| B9 | 1940  | Po10 cerebellum               |
| BA | 256   | Po16 medulla oblongata        |
| BB | 246   | Po21 cerebellum               |
| BC | 289   | Po1month cerebellum           |
| BD | 281   | Po0 cortex                    |
| BE | 471   | gall bladder                  |
| BF | 702   | vesicular gland               |
| BG | 352   | e11 spinal cord               |
| BH | 261   | e14 lung                      |
| BI | 394   | 1cell                         |
| BJ | 3     | 3cells                        |
| BK | 75    | 4cells                        |
| BL | 227   | morula                        |
| BM | 62    | e4 w.body                     |
| BN | 347   | e5 w.body                     |
| BO | 593   | e14 liver                     |
| BP | 592   | Pr11 placenta                 |
| BQ | 565   | Pr12 placenta                 |
| BR | 429   | Pr13 placenta                 |
| BS | 804   | Pr14 placenta                 |
| BT | 496   | Pr15 placenta                 |
| BU | 291   | e14 amnion                    |
| BV | 115   | thymus CD4+CD8+Tcells         |
| BX | 630   | spleen Th2 CD4+Tcells         |
| BY | 8582  | TIB-55 BB88                   |
| BZ | 10223 | CRL-1722 L5178Y-R             |

|    |      |                                  |
|----|------|----------------------------------|
| C0 | 1079 | c.striatum                       |
| C1 | 2924 | e16 head                         |
| C2 | 2214 | Po0 cerebellum                   |
| C3 | 1392 | ES cells                         |
| C4 | 1214 | e7 whole body                    |
| C5 | 993  | e12 spinal cord                  |
| C6 | 1222 | hippocampus                      |
| C7 | 1428 | SV40Tantigen transgenic mouse he |
| C8 | 1616 | "pancreas, Islet cells"          |
| C9 | 1093 | Po2 thymic cells                 |
| CA | 1549 | e16 heart                        |
| CB | 1901 | e16 kidney                       |
| CC | 2558 | e17 heart                        |
| CD | 1334 | e17 stomach                      |
| CE | 2500 | e17 kidney                       |
| CF | 3555 | e17 amnion                       |
| CG | 1420 | e13 liver                        |
| CH | 301  | spleen                           |
| CI | 700  | kidney                           |
| CJ | 1529 | testis                           |
| CK | 766  | thymus                           |
| CL | 677  | heart                            |
| CM | 859  | colon                            |
| CN | 1032 | stomach                          |
| CO | 1287 | liver                            |
| CP | 757  | e13 w.body                       |
| CQ | 1079 | e14 w.body                       |
| CR | 1131 | e16 w.body                       |
| CS | 943  | e17 w.body                       |
| CT | 1775 | e15 amnion                       |
| CU | 1019 | Po10 brain                       |
| CV | 1285 | Po10 thymus                      |
| CW | 1336 | Po10 heart                       |
| D0 | 1730 | e9 w.body                        |
| D1 | 2339 | e12 spinal cord                  |
| D2 | 1534 | e12 eyeball                      |
| D3 | 1528 | e13 heart                        |
| D4 | 2037 | e13 lung                         |
| D5 | 723  | e13 stomach                      |
| D6 | 1422 | Po0 kidney                       |
| D7 | 718  | L10 mammary gland                |
| D8 | 1195 | Po16 heart                       |
| D9 | 2145 | e15 head                         |
| E0 | 2756 | Po0 lung                         |
| E1 | 2756 | Po0 eyeball                      |
| E2 | 1386 | Pr2 oviduct                      |
| E3 | 1807 | Pr2 ovary                        |
| E4 | 1866 | Po2 thymic cells                 |
| E5 | 1669 | Po10 olfactory brain             |
| E6 | 169  | e14 eyeball                      |
| E8 | 2044 | embryo 8cells                    |
| E9 | 1152 | e12 w.body                       |
| F4 | 5317 | Po6 spleen                       |
| F5 | 4678 | kidney                           |

|    |       |                                            |
|----|-------|--------------------------------------------|
| F6 | 20758 | NOD-derived CD11c+ve dendritic cells       |
| F7 | 18745 | B6-derived CD11+ve dendritic cells         |
| F8 | 14964 | activated spleen from NOD.Cz ldd3          |
| F9 | 11126 | inner ear                                  |
| G2 | 869   | melanocyte                                 |
| G3 | 8537  | B16F10Y cells cytoRNA                      |
| G5 | 1378  | LPS-treated bone marrow macrophage         |
| G7 | 6967  | RCB-0558 LLC                               |
| G8 | 7095  | RCB-0526 Jyg-MC(A)                         |
| G9 | 7633  | RCB-0527 Jyg-MC(B)                         |
| I1 | 2928  | mix blastocyst                             |
| I2 | 589   | olfactory mucosa olfactory sensory neurons |
| I3 | 5171  | stroma cell                                |
| I4 | 8976  | osteoclast-like cell                       |
| I8 | 21424 | LPS-treated bone marrow macrophage         |
| K0 | 1470  | erythroblast                               |
| K1 | 1251  | bone marrow mast cells                     |
| K2 | 15328 | mix Po18 visual cortex                     |
| K3 | 12611 | mix Po24 visual cortex                     |
| K4 | 17112 | mix Po28 visual cortex                     |
| K5 | 16246 | mix Po55 visual cortex                     |
| K9 | 3038  | e12.5 rathke's pouches                     |
| L0 | 7568  | Tg197 SFs Synovial fibroblasts             |
| L1 | 8429  | F1 SFs Synovial fibroblasts                |
| L2 | 7500  | F1 WHJ/whole joints                        |
| L3 | 5877  | mix 15 days embryo whole body              |
| L4 | 4646  | mix 18 days embryo whole body              |
| L5 | 5084  | male adult lung                            |
| L6 | 9630  | male adult brain                           |
| L7 | 3208  | Tg197 WHJ/whole joints                     |
| L8 | 6346  | Tg197 WHJ/whole joints                     |
| L9 | 20551 | mix 17.5 days embryo whole body            |
